# Supplementary material for: Hydrophilic nanoparticles packed in oral tablets can improve the plasma profile of short half-life hydrophobic drugs
Source: Royal Society of Chemistry journal article supplement (doi:10.1039/c6ra11799f), 2016-01-01
Supplement: c6ra11799f1.pdf [file c6ra11799f1.pdf]

## Hydrophilic Nanoparticles Packed in Oral Tablets Can Improve the Plasma Profile of Short Half-Life Hydrophobic Drugs

Faisal Usman,<sup>\*a,b</sup> Ibrahim Javed,<sup>\*c</sup> Syed Zajif Hussain,<sup>c</sup> Nazar Muhammad Ranjha,<sup>b</sup>

a Drug Delivery System Excellence Center, Department of Pharmaceutical Technology, Faculty of Pharmaceutical Sciences, Prince of Songkla University, Hat Yai, Songkhla 90112, Thailand,  
[faisal.usman@bzu.edu.pk](mailto:faisal.usman@bzu.edu.pk)

b Faculty of Pharmacy, Bahauddin Zakariya University, Bosan Road, Multan 60000, Pakistan

c Department of Chemistry, SBA-School of Science and Engineering, Lahore University of Management Sciences, DHA, Lahore Cantt 54792, Pakistan, [ibr\\_pharmacist@yahoo.com](mailto:ibr_pharmacist@yahoo.com), [Ibrahim.javed@lums.edu.pk](mailto:Ibrahim.javed@lums.edu.pk)

\*Correspondence

**Supporting Information**

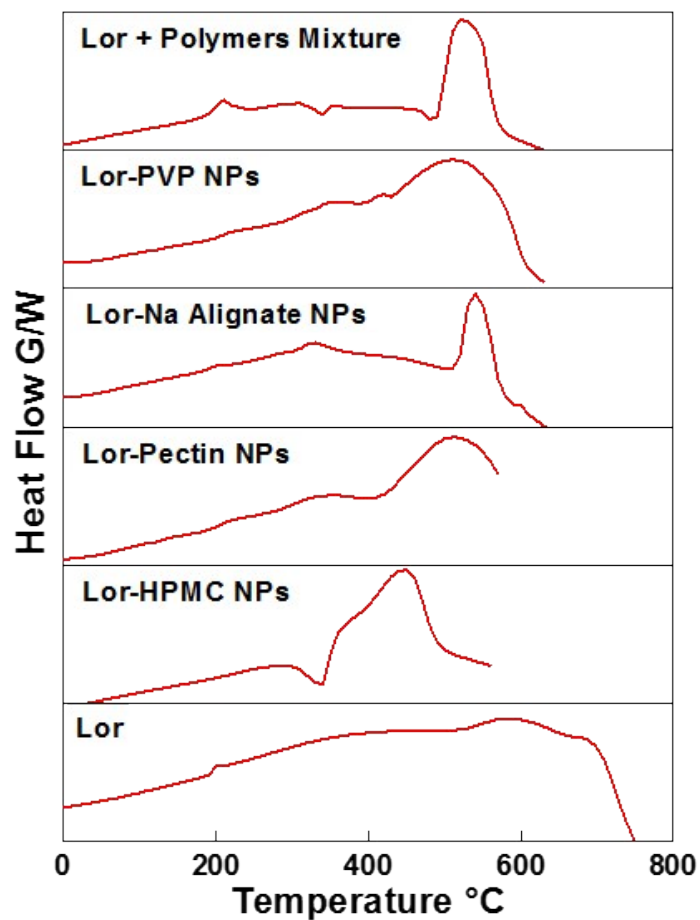

**Figure S1.** Diffraction Scanning Calorimetry thermogram of Lor and Lor polymeric NPs. The characteristic crystalline peak of Lor, observable at 200 °C, is diminished in thermograms of NPs indicating amorphous state of Lor inside NPs.

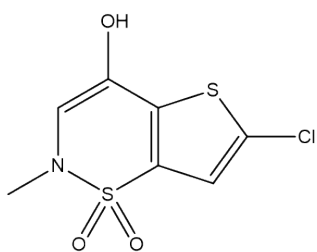

**6-chloro-4-hydroxy-2-methyl-2H-thieno[2,3-e]-1,2-thiazine-1,1-dioxide**

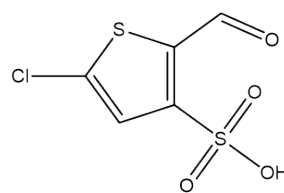

**5-chloro-2-formylthiophene-3-sulfonic acid**

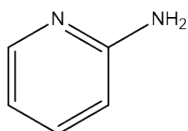

**2-aminopyridine**

**Figure S2.** Degradation products of Lor under hydrolysis as described by Dattatray et. al. <sup>1</sup>

**Table S1.** Pre-compression and post-compression properties of NC Tablets and CL Tablets powder blend and compression tablets (Mean±SD).

| Formulation Blend | Angle of repose | Hausner's ratio | Carr's index (%) | Uniformity of weight (Mean ± SD) | Uniformity of content (Mean ± SD) | Tensile strength (Kg/cm <sup>2</sup> ) (Mean ± SD) |
|-------------------|-----------------|-----------------|------------------|----------------------------------|-----------------------------------|----------------------------------------------------|
| CL1               | 28.81±1.21      | 1.14±0.047      | 12.3±1.24        | 151.72 ± 1.93                    | 98.71 ± 2.78                      | 1.685                                              |
| NC1               | 27.43±1.33      | 1.13±0.024      | 11.9±0.89        | 149.82 ± 2.01                    | 99.24 ± 2.88                      | 1.699                                              |
| CL2               | 27.78±1.54      | 1.15±0.036      | 13.18±1.25       | 149.23 ± 2.67                    | 97.55 ± 4.46                      | 1.749                                              |
| NC2               | 26.22±2.01      | 1.14±0.029      | 12.4±2.12        | 150.61 ± 2.57                    | 101.02 ± 1.34                     | 1.736                                              |
| CL3               | 28.49±1.98      | 1.15±0.047      | 13.3±2.47        | 152.32 ± 2.51                    | 100.54 ± 3.11                     | 1.875                                              |
| NC3               | 25.95±2.34      | 1.13±0.038      | 11.6±1.89        | 151.20 ± 1.84                    | 100.88 ± 4.25                     | 1.829                                              |
| CL4               | 29.55±1.51      | 1.14±0.045      | 12.1±1.54        | 149.98 ± 2.79                    | 99.11 ± 3.24                      | 1.679                                              |
| NC4               | 25.07±1.24      | 1.11±0.05       | 9.8±1.2          | 150.05 ± 2.37                    | 101.98 ± 3.34                     | 1.738                                              |

**Table S2.** Kinetic modeling by fitting *in-vitro* drug release data in different models

| Formulation         | Zero order     |        | First order    |        | Higuchi model  |                | Korsmeyer-Peppas |                |       |
|---------------------|----------------|--------|----------------|--------|----------------|----------------|------------------|----------------|-------|
|                     | R <sup>2</sup> | Ko     | R <sup>2</sup> | K      | R <sup>2</sup> | K <sub>H</sub> | R <sup>2</sup>   | K <sub>1</sub> | N     |
| CL1                 | 0.8885         | 14.34  | 0.6138         | 0.20   | 0.9968         | 47.77          | 0.9964           | 50.25          | 0.45  |
| NC1                 | 0.9877         | 14.83  | 0.7243         | 0.4060 | 0.9321         | 30.38          | 0.9758           | 18.93          | 0.84  |
| CL2                 | 0.9776         | 12.58  | 0.6321         | 0.2555 | 0.9735         | 31.13          | 0.9959           | 21.22          | 0.74  |
| NC2                 | 0.9885         | 8.74   | 0.6454         | 0.2610 | 0.9639         | 21.90          | 0.9951           | 15.99          | 0.79  |
| CL3                 | 0.9455         | 10.14  | 0.5759         | 0.2141 | 0.992          | 31.09          | 0.9934           | 29.02          | 0.56  |
| NC3                 | 0.9951         | 7.27   | 0.7185         | 0.3393 | 0.9232         | 14.42          | 0.9909           | 7.91           | 0.95  |
| CL4                 | 0.9323         | 11.19  | 0.5629         | 0.2239 | 0.9904         | 32.41          | 0.9973           | 28.64          | 0.60  |
| NC4                 | 0.9801         | 7.77   | 0.6302         | 0.2210 | 0.9514         | 19.74          | 0.9552           | 12.80          | 0.83  |
| Lor-HPMC NPs        | 0.6860         | 13.659 | 0.9970         | 0.363  | 0.9764         | 35.262         | 0.9787           | 37.780         | 0.461 |
| Lor-Pecting NPs     | 0.9654         | 9.738  | 0.9566         | 0.181  | 0.9366         | 26.875         | 0.9955           | 15.798         | 0.769 |
| Lor-Na Alginate NPs | 0.9664         | 9.229  | 0.9474         | 0.163  | 0.9293         | 25.446         | 0.9909           | 14.503         | 0.784 |
| Lor-PVP NPs         | 0.9820         | 8.609  | 0.8799         | 0.136  | 0.8176         | 23.248         | 0.9870           | 6.572          | 1.128 |

Abbreviations: R<sup>2</sup> = coefficient of determination, Ko = zero order rate constant, K = first order rate constant, KH = Higuchi constant, K<sub>1</sub> = Korsmeyer-Peppas model rate constant, n = release exponent

## References

1. D. T. Modhave, T. Handa, R. P. Shah and S. Singh, *Journal of pharmaceutical and biomedical analysis*, 2011, **56**, 538-545.
